# Supplementary material
Source: PubMed Central journal article supplement (PMC6746175)

# Supplementary Figure 1

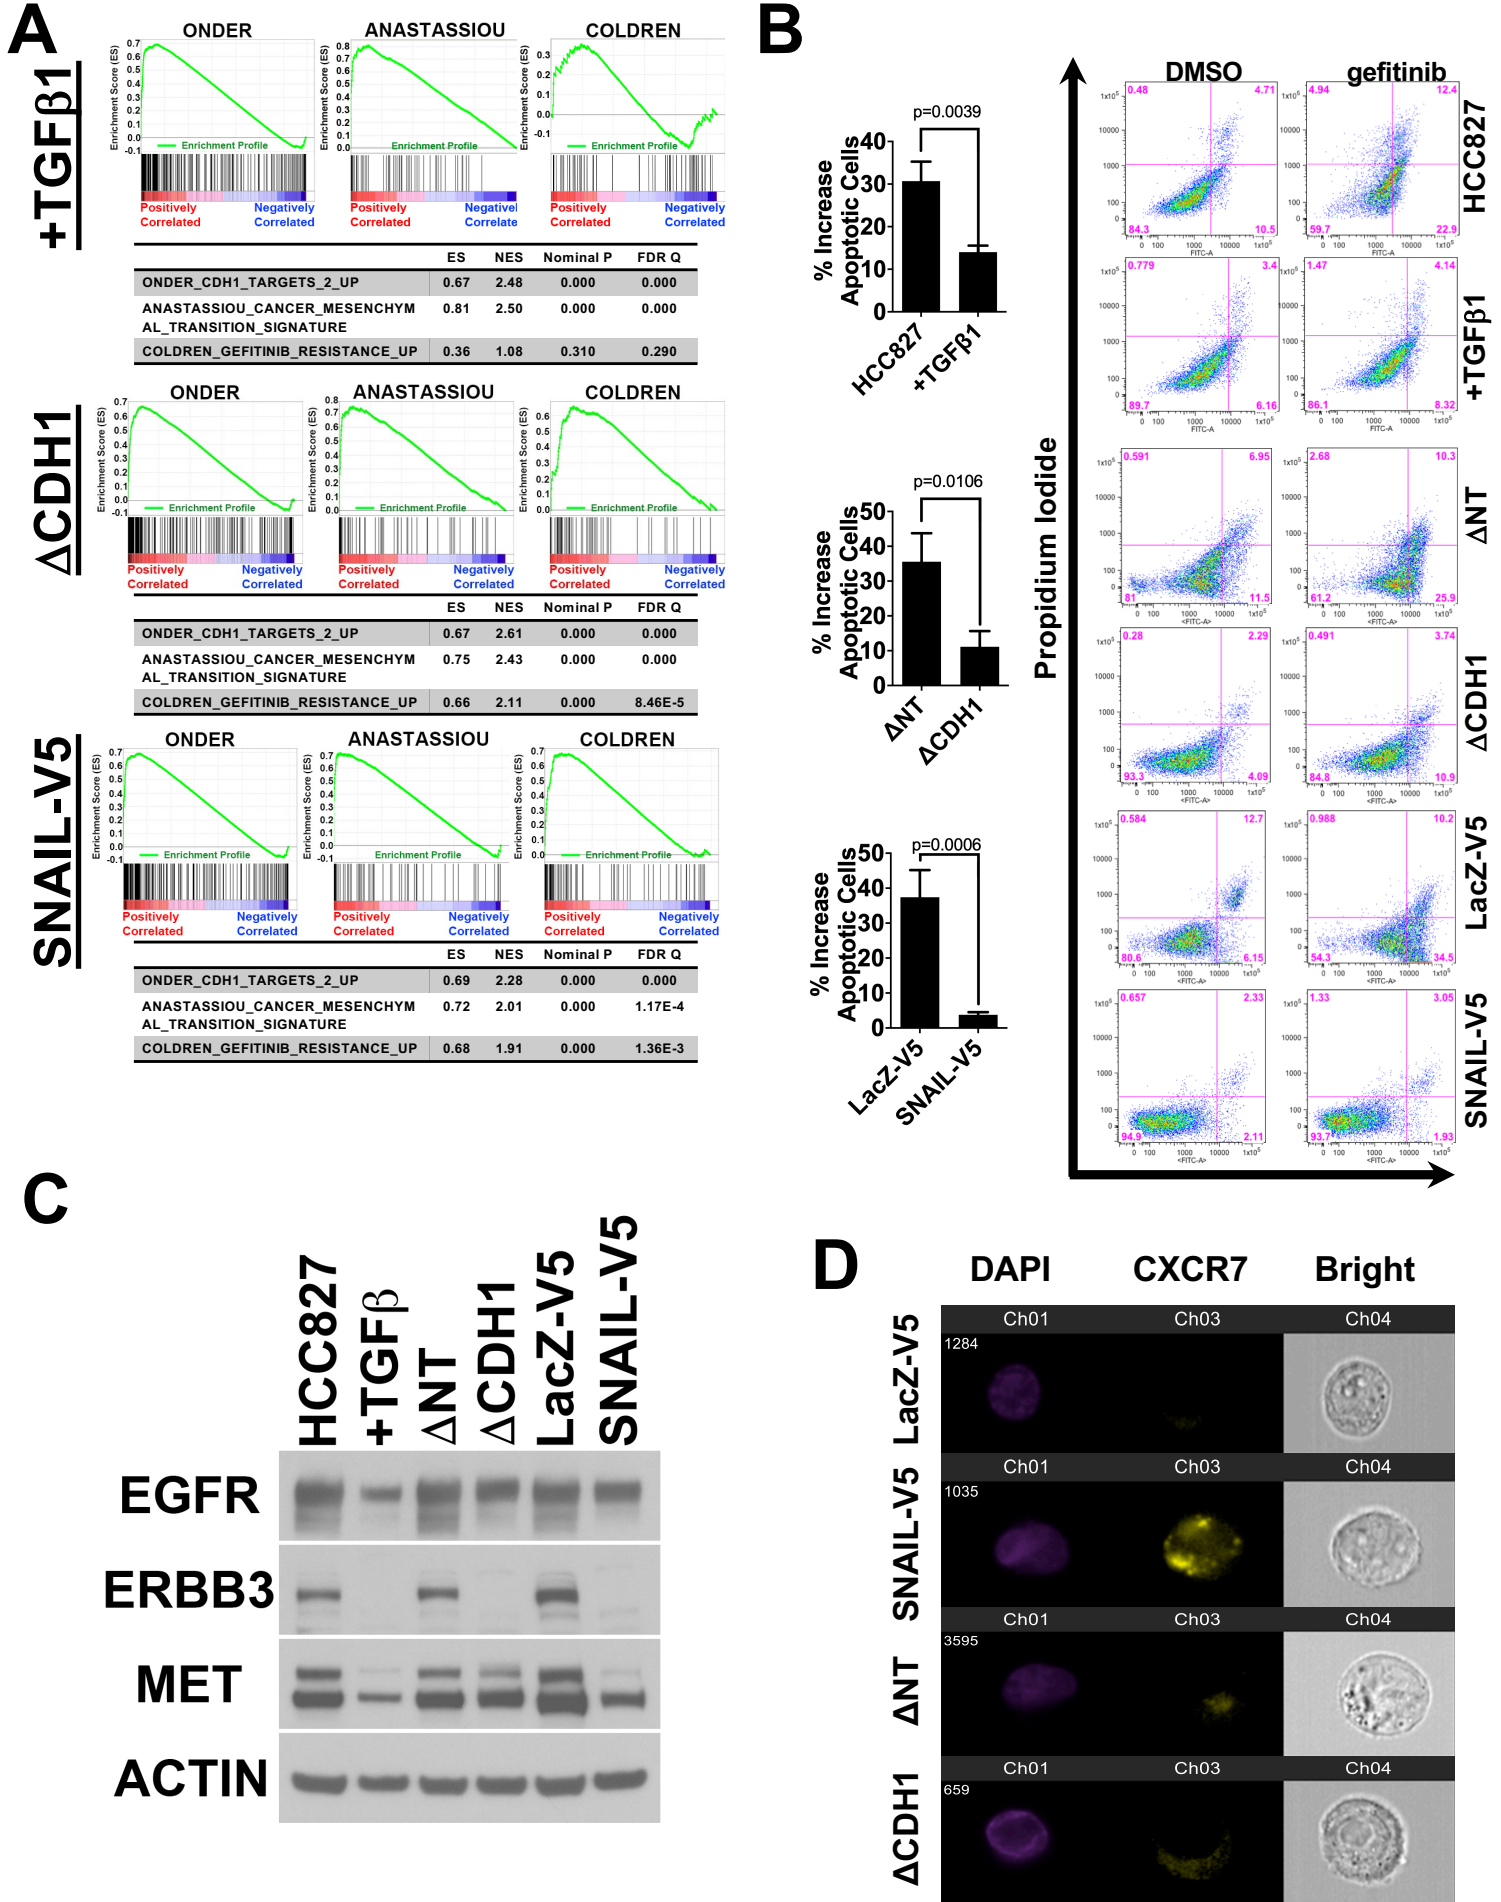

# Supplementary Figure 2

**A**

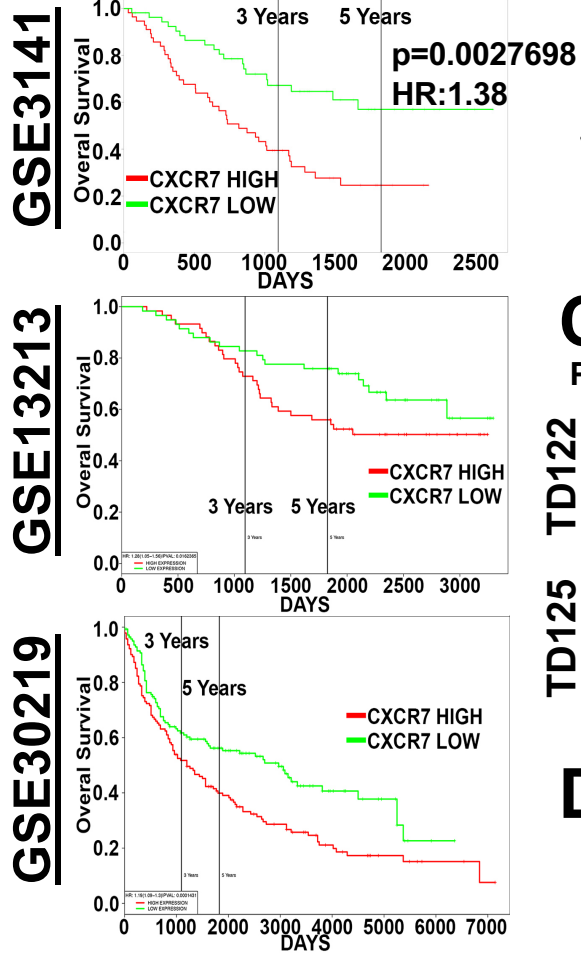

**B**

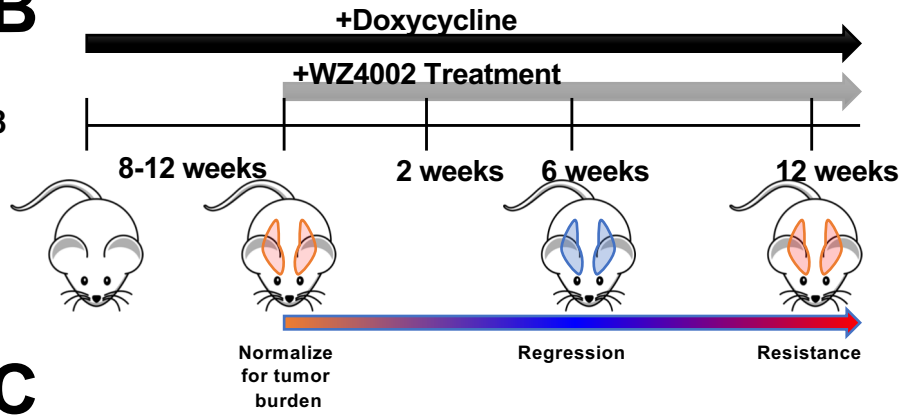

**C**

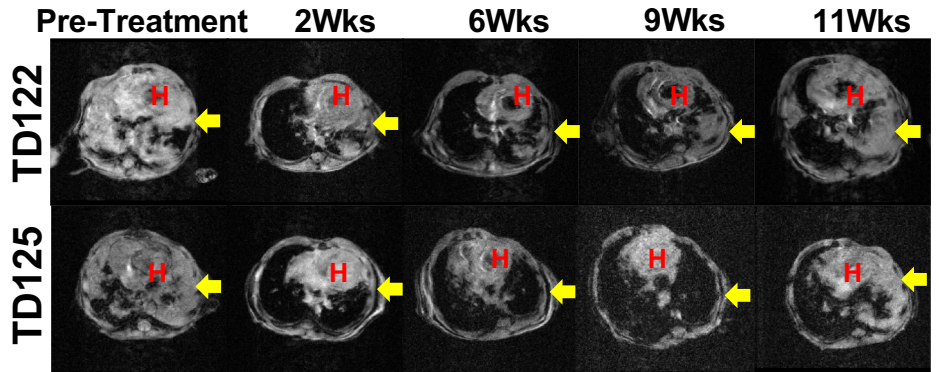

**D**

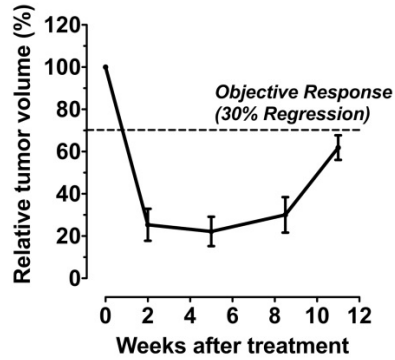

**E**

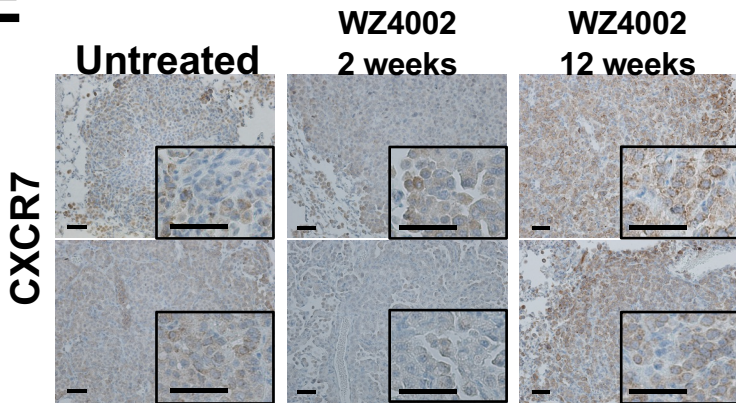

**F**

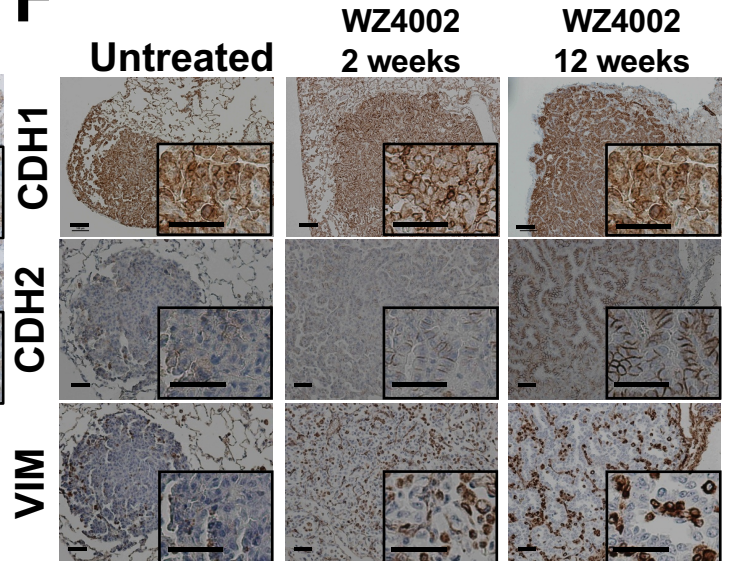

# Supplementary Figure 3

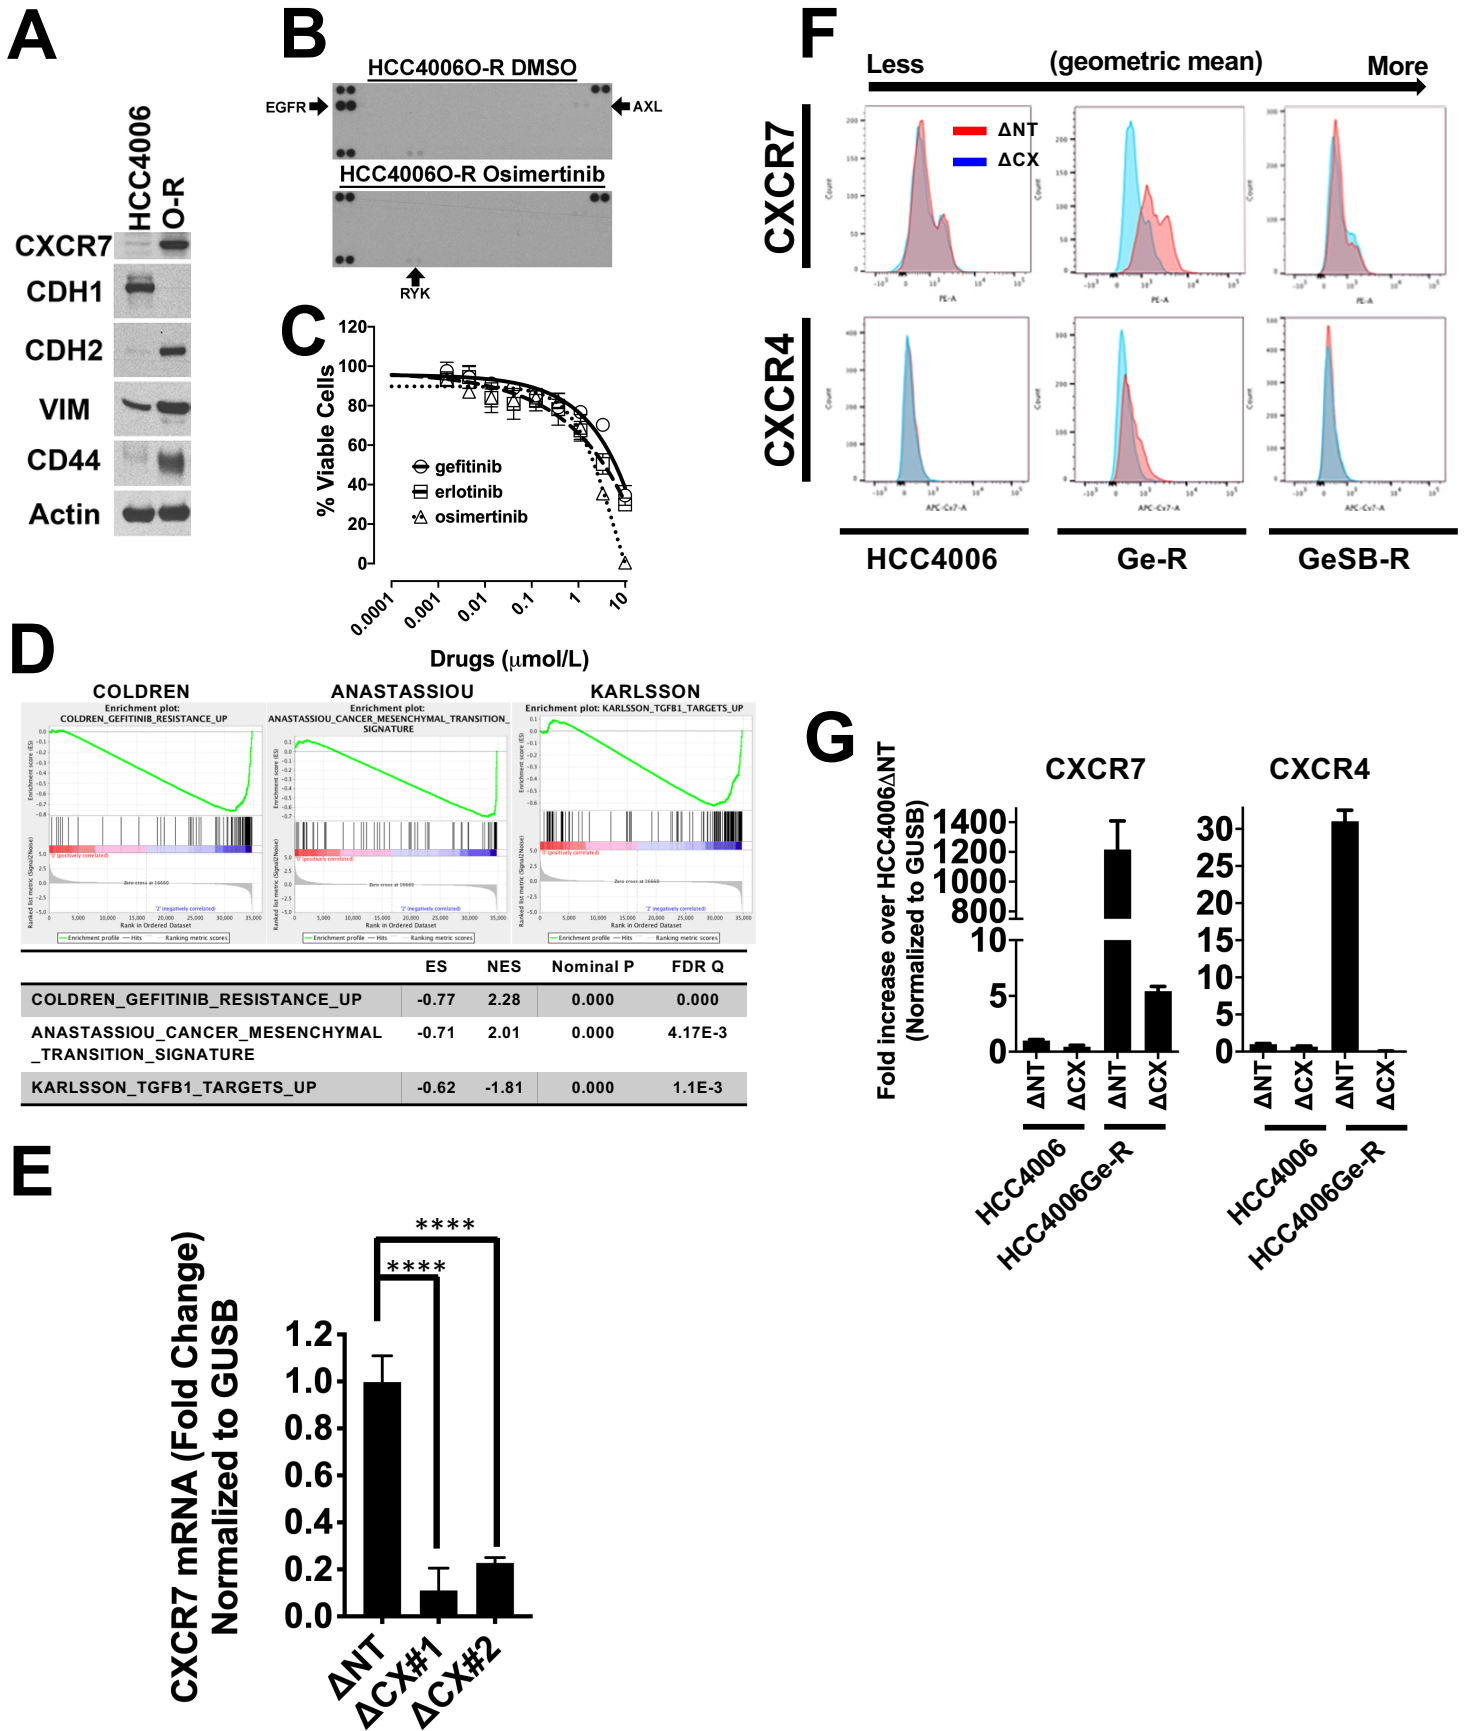



# Supplementary Figure 4

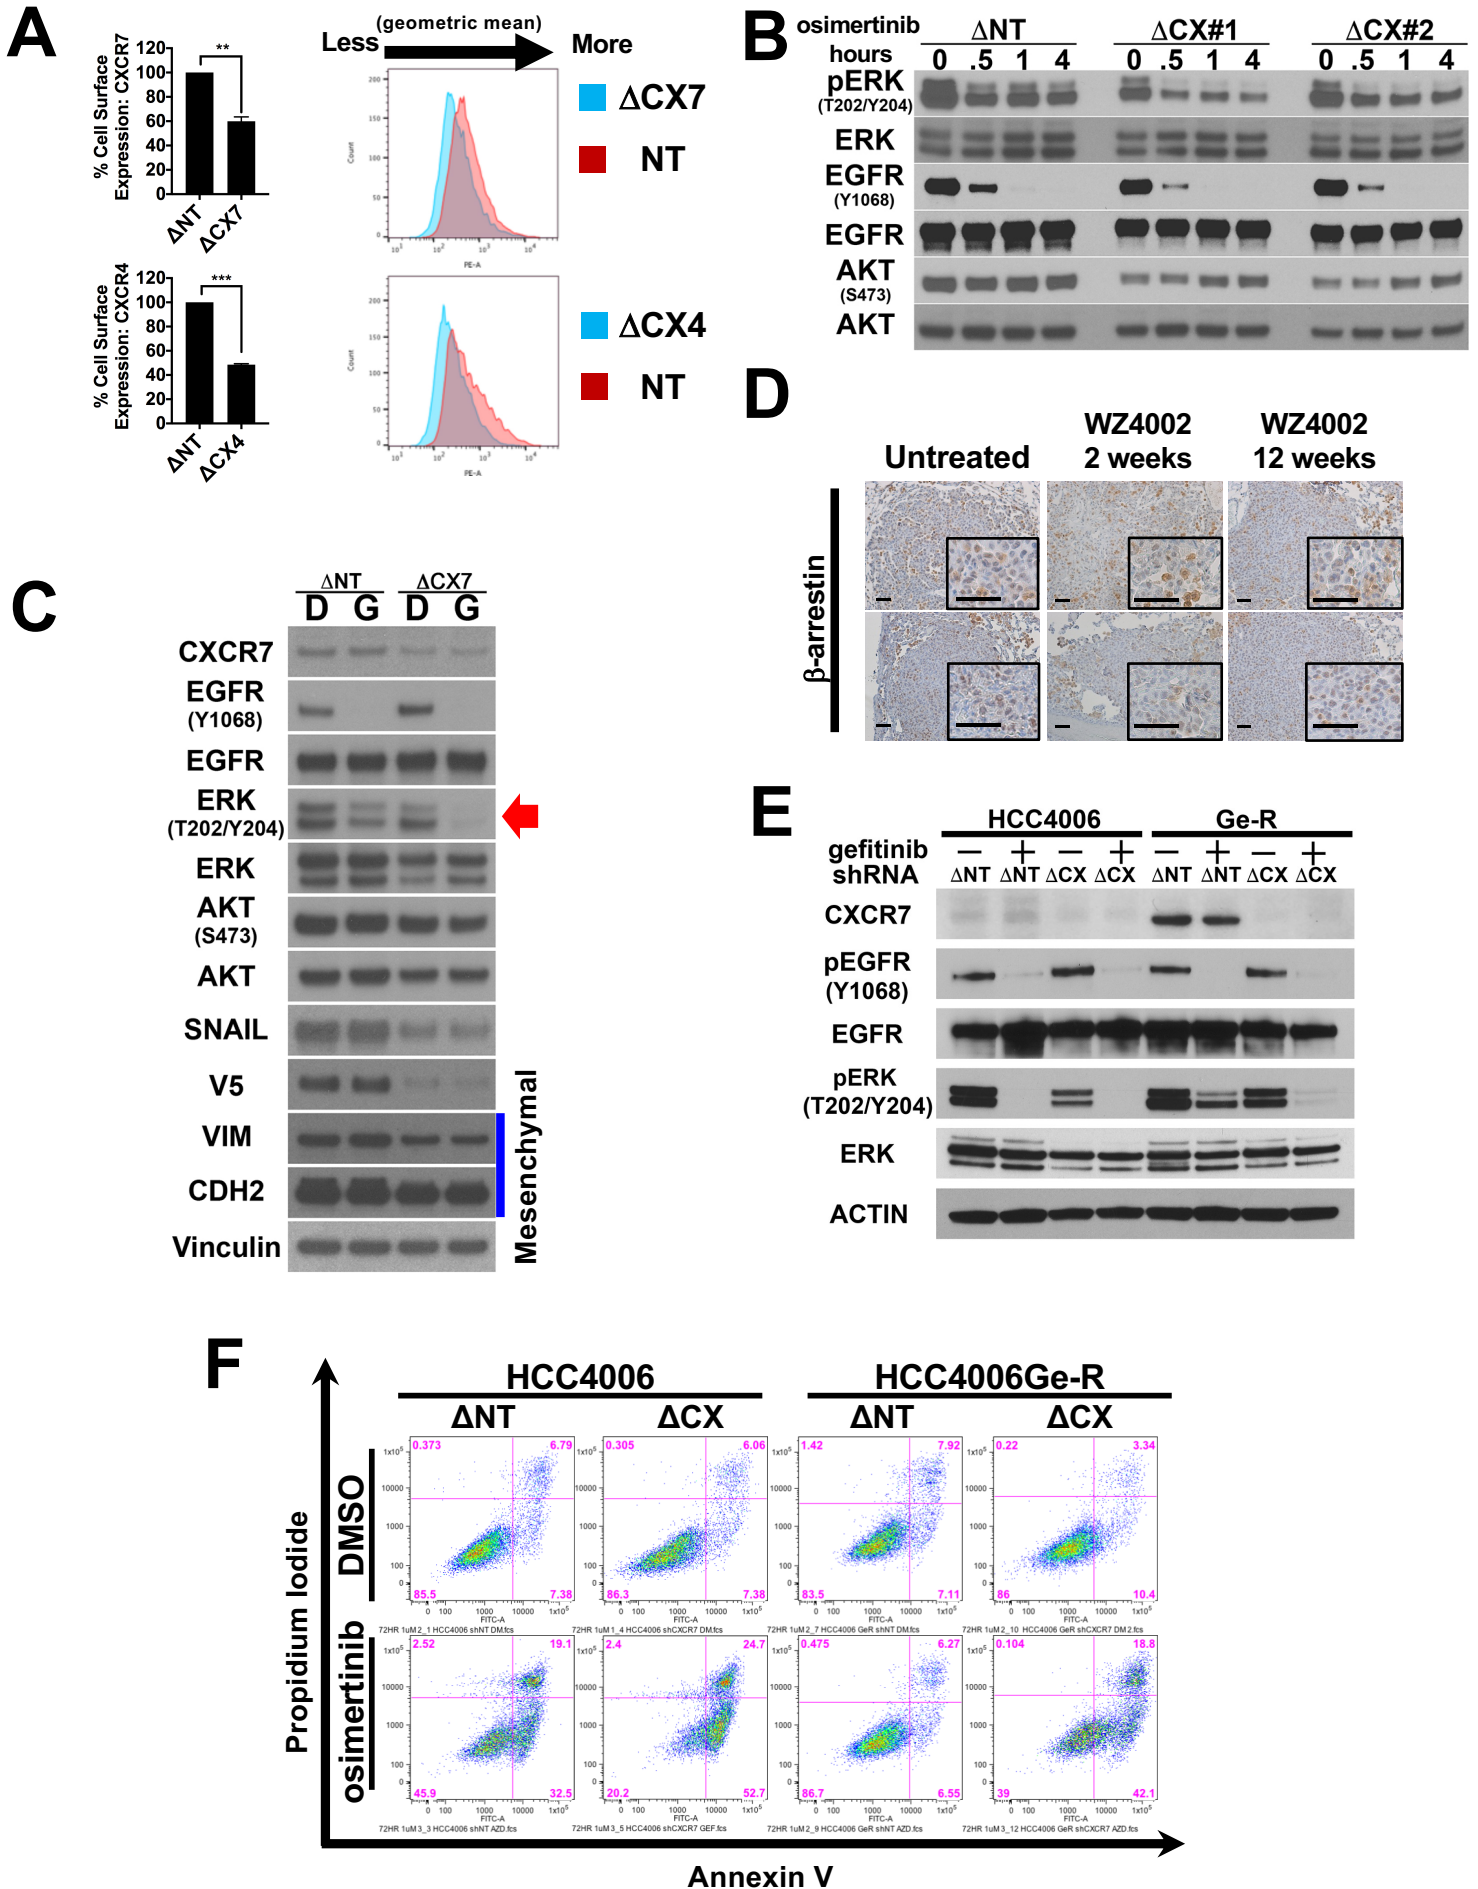



# Supplementary Figure 5

## A

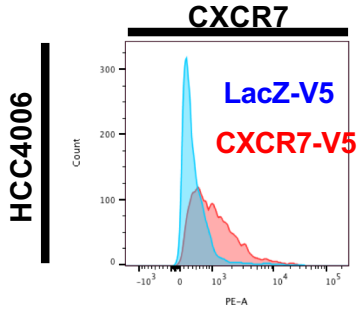

## B

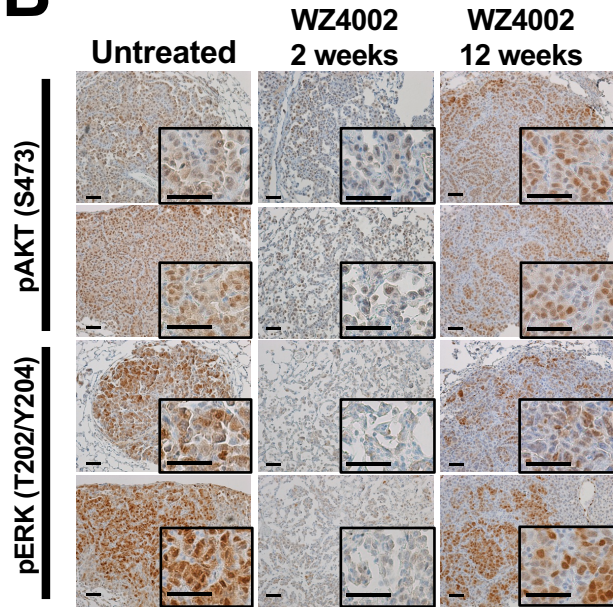

## D

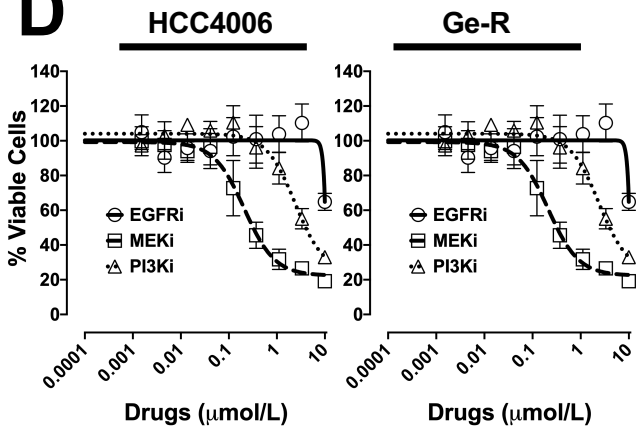

## C

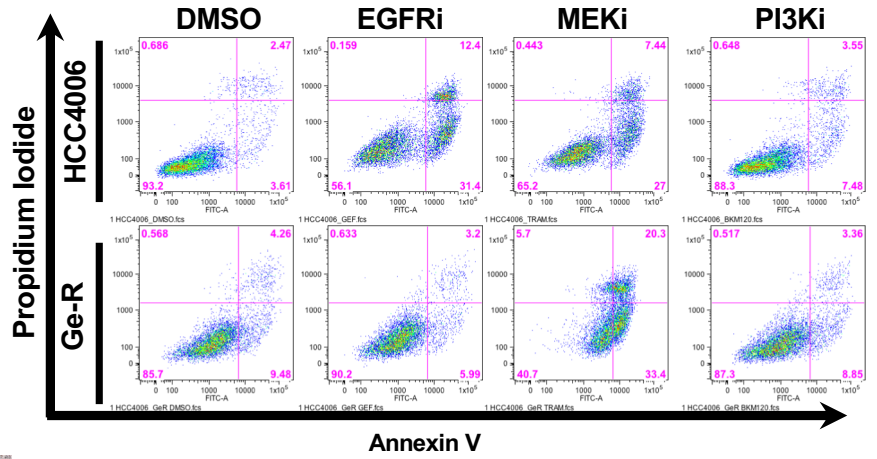

## E

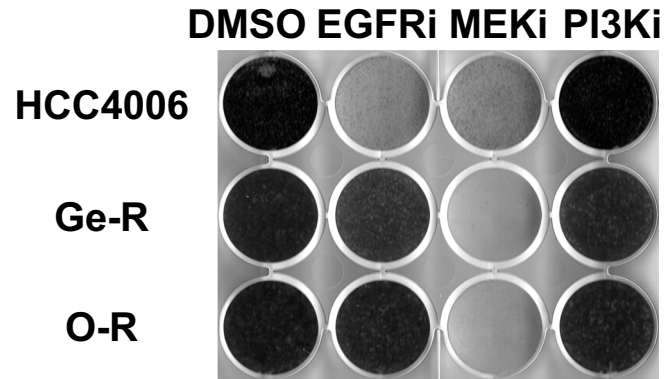

## F

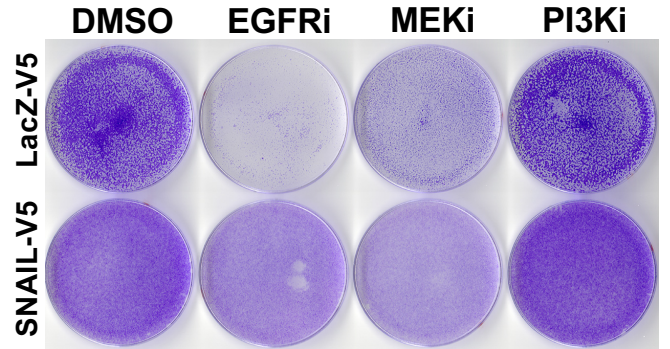

## G

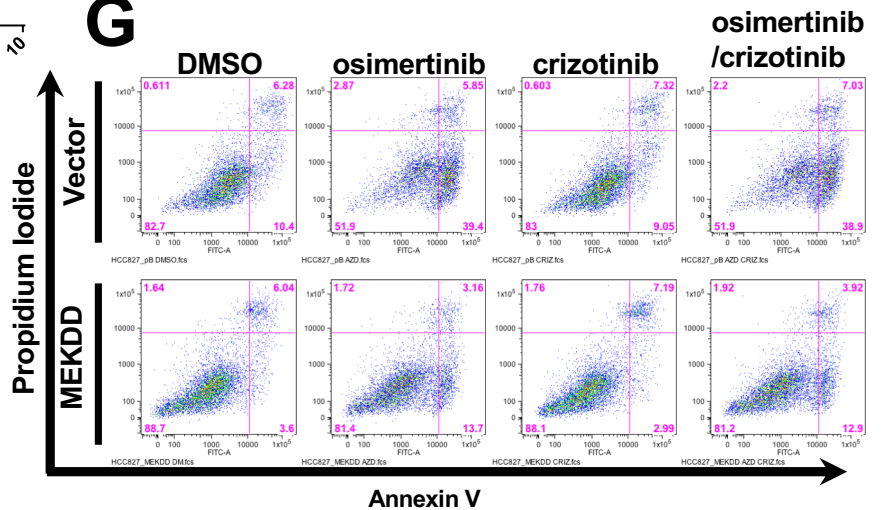

# Supplementary Figure 6

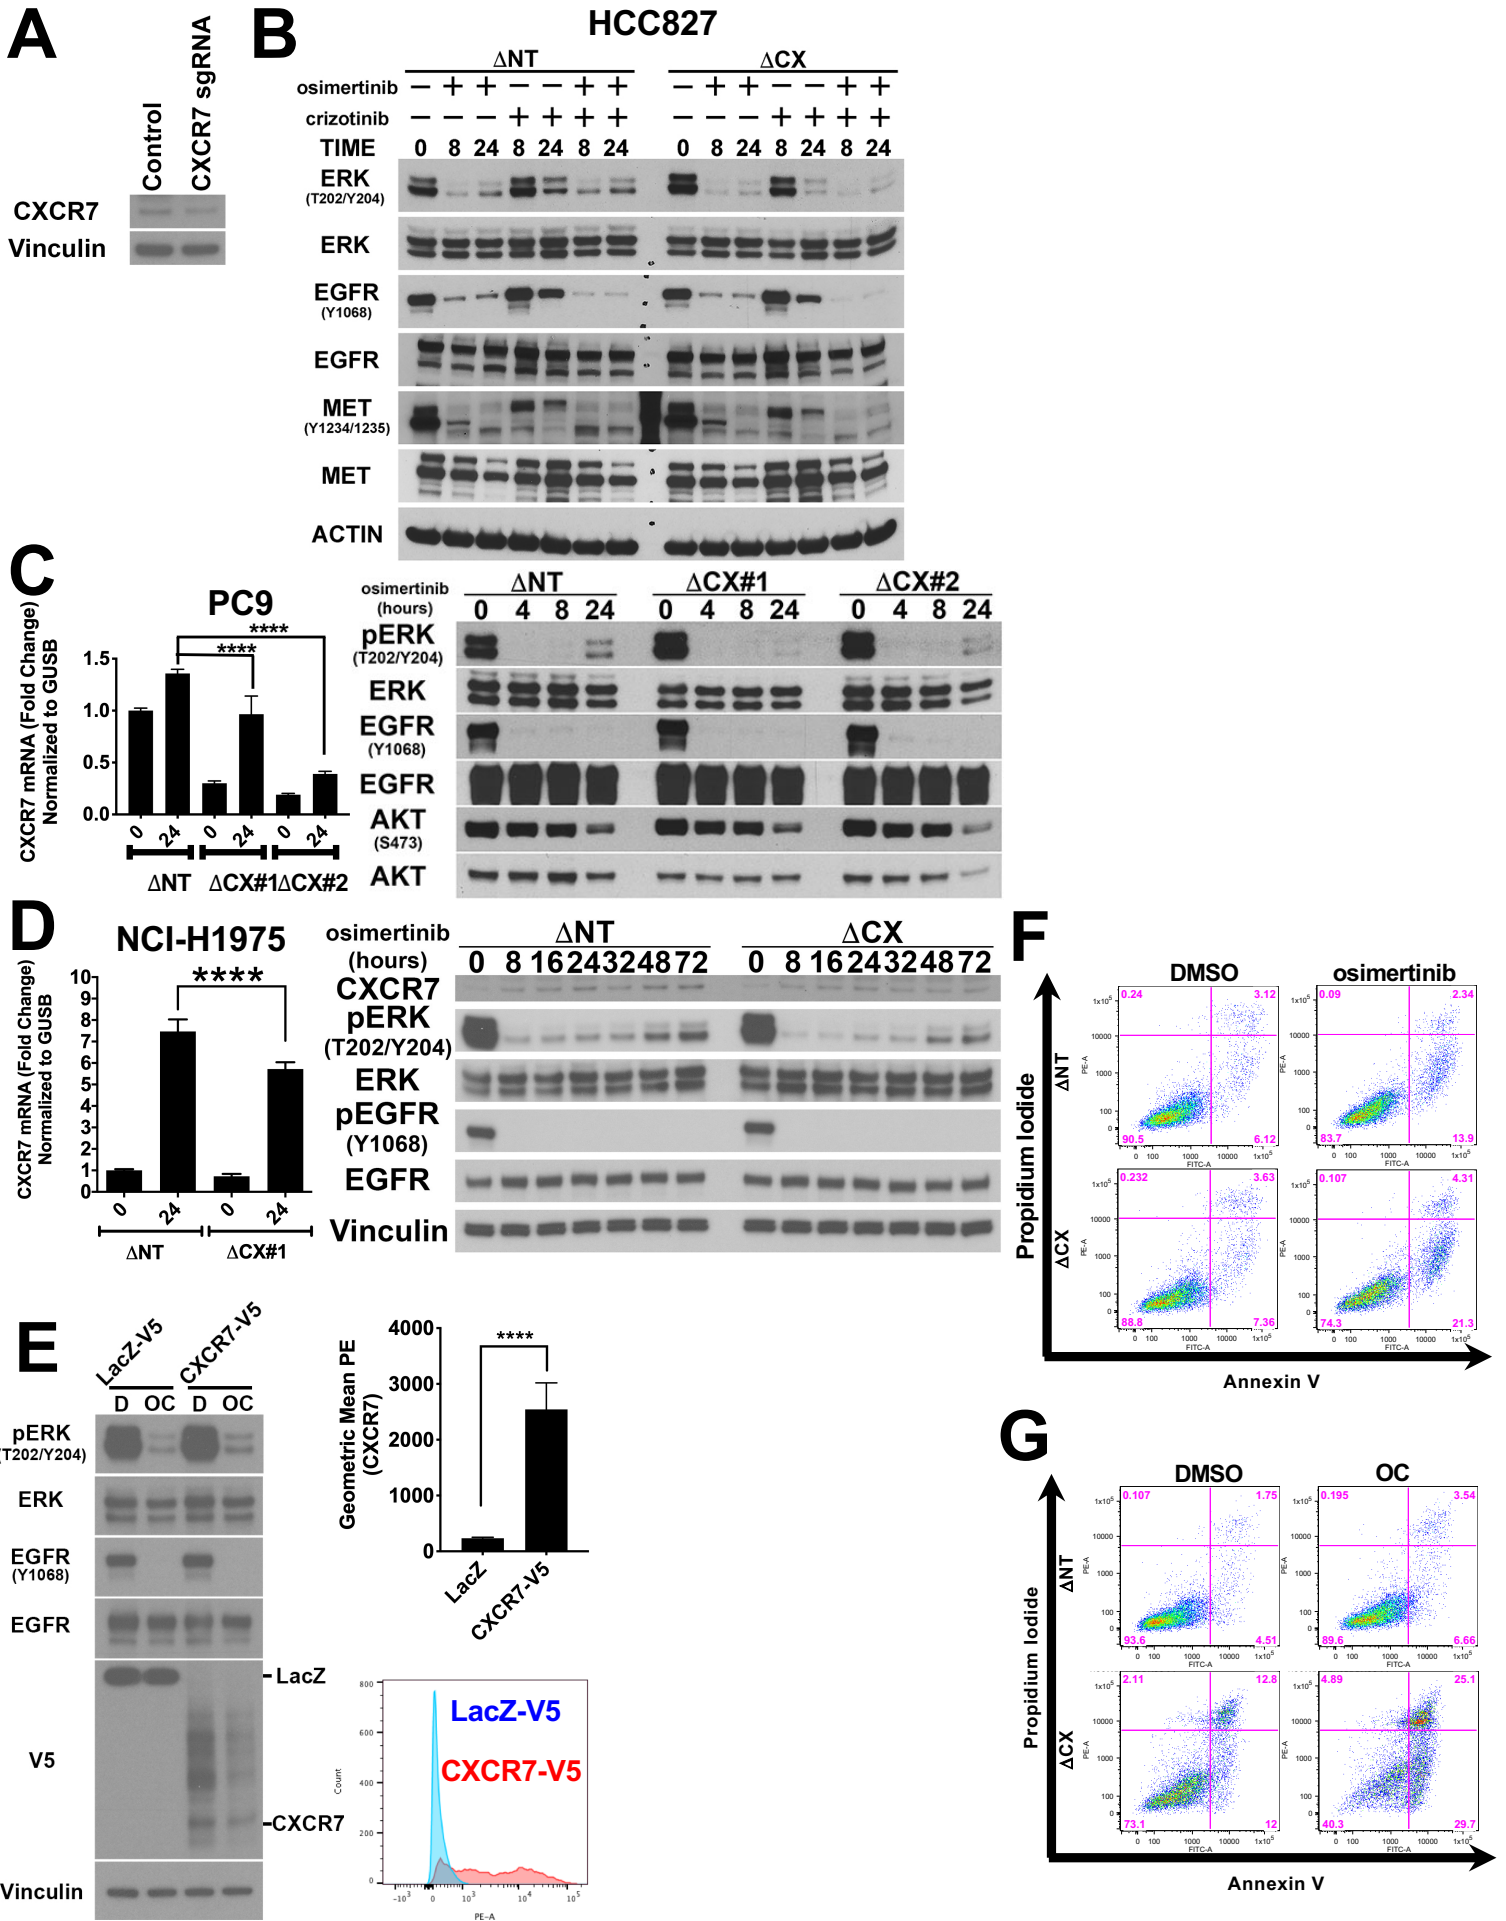

Supplement: NIHMS1533707-supplement-4.pdf [file NIHMS1533707-supplement-4.pdf]
